# Supplementary material for: Effects of substrate stiffness and actomyosin contractility on coupling between force transmission and vinculin–paxillin recruitment at single focal adhesions
Source: PubMed Central journal article supplement — Mol Biol Cell. 2017 Jul 7;28(14):1901–11. doi: 10.1091/mbc.E17-02-0116 (PMC5541841; doi:10.1091/mbc.e17-02-0116), 2017-07-07
Supplement: supp_E17-02-0116v1_CombinedSupMats.pdf [file supp_E17-02-0116v1_CombinedSupMats.pdf]

# Supplemental Materials

*Molecular Biology of the Cell*

Zhou et al.

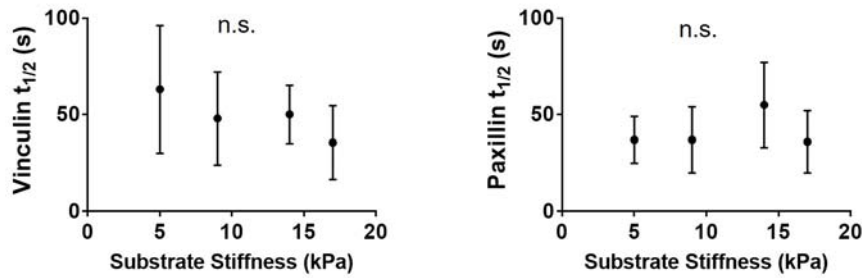

**Figure S1:** Relationship between substrate stiffness and vinculin  $t_{1/2}$  and paxillin  $t_{1/2}$  (average  $\pm$  SD,  $n = 18-25$  FAs) at single FAs for MEFs cultured on different substrate stiffness. No relationship between substrate stiffness and vinculin or paxillin residence time at FAs was detected.

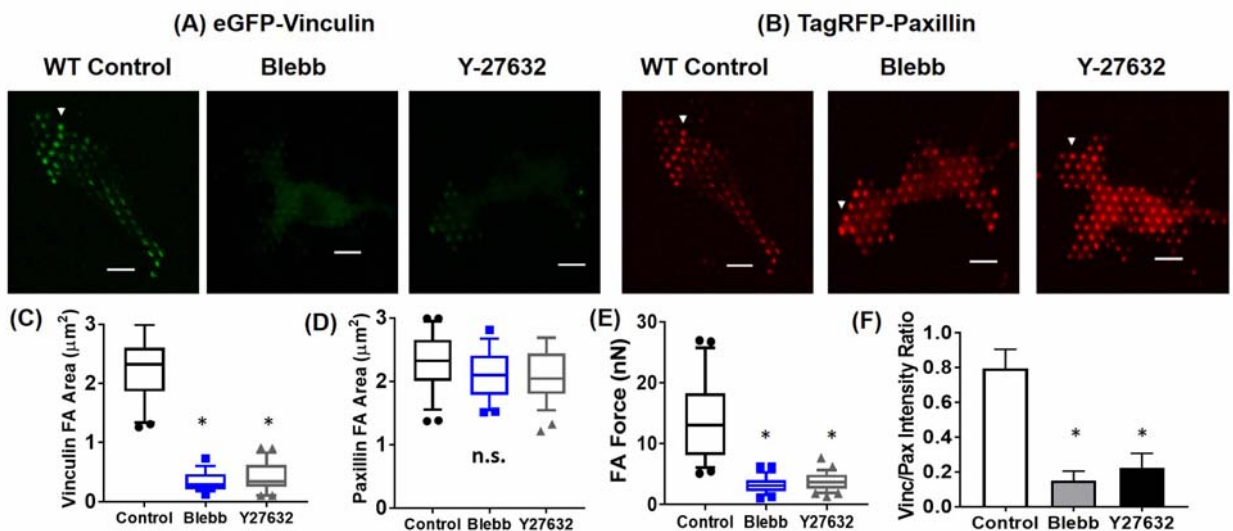

**Figure S2:** Comparison between blebbistatin and Y-27632 effects on FA assembly and traction force generation. (A) Vinculin (green) and (B) paxillin (red) on mPADs of 14 kPa in the presence of no inhibitor, 20  $\mu$ M blebbistatin for 1 h, or 50  $\mu$ M Y-27632 for 1 h. White arrowheads indicate FAs. Scale bar 10  $\mu$ m. Effects of inhibitors (C-F) on vinculin FA area (C), paxillin FA area (D), and traction force at single FAs (E), plotted as box-whisker plots (median, 10<sup>th</sup>, 25<sup>th</sup>, 75<sup>th</sup>, and 90<sup>th</sup> percentile,  $n > 25$ ). (F) Effects of substrate stiffness and actomyosin contractility on vinculin/paxillin intensity ratio at single FAs ( $n > 25$ , mean  $\pm$  SD). \*  $P < 0.01$  vs. WT control.

**Table S1:** Summary of linear regression results between vinculin-paxillin area and force at single FAs. Data presented are results from figures 3 (WT vinculin and paxillin) and 4 (T12 vinculin and WT paxillin). A-B represent WT and T12 vinculin and force. C-D represent paxillin and force for WT and T12 vinculin expressing MEFs.

| <b>(A) WT Vinculin and Force</b> |                     |                      |                               |
|----------------------------------|---------------------|----------------------|-------------------------------|
| <b>Stiffness</b>                 | <b>Blebbistatin</b> | <b>R<sup>2</sup></b> | <b>P-value vs. Zero Slope</b> |
| 3 kPa                            | Control             | 0.02                 | 0.44                          |
| 3 kPa                            | Treatment           | 0.01                 | 0.88                          |
| 5 kPa                            | Control             | 0.07                 | 0.16                          |
| 5 kPa                            | Treatment           | 0.01                 | 0.54                          |
| 14 kPa                           | Control             | 0.01                 | 0.93                          |
| 14 kPa                           | Treatment           | 0.05                 | 0.26                          |

| <b>(B) T12 Vinculin and Force</b> |                     |                      |                               |
|-----------------------------------|---------------------|----------------------|-------------------------------|
| <b>Stiffness</b>                  | <b>Blebbistatin</b> | <b>R<sup>2</sup></b> | <b>P-value vs. Zero Slope</b> |
| 3 kPa                             | Control             | 0.06                 | 0.21                          |
| 3 kPa                             | Treatment           | 0.06                 | 0.17                          |
| 5 kPa                             | Control             | 0.05                 | 0.29                          |
| 5 kPa                             | Treatment           | 0.01                 | 0.87                          |
| 14 kPa                            | Control             | 0.07                 | 0.24                          |
| 14 kPa                            | Treatment           | 0.11                 | 0.07                          |

| <b>(C) Paxillin and Force for WT Vinculin MEF</b> |                     |                      |                               |
|---------------------------------------------------|---------------------|----------------------|-------------------------------|
| <b>Stiffness</b>                                  | <b>Blebbistatin</b> | <b>R<sup>2</sup></b> | <b>P-value vs. Zero Slope</b> |
| 3 kPa                                             | Control             | 0.01                 | 0.52                          |
| 3 kPa                                             | Treatment           | 0.07                 | 0.13                          |
| 5 kPa                                             | Control             | 0.07                 | 0.17                          |
| 5 kPa                                             | Treatment           | 0.01                 | 0.61                          |
| 14 kPa                                            | Control             | 0.01                 | 0.65                          |
| 14 kPa                                            | Treatment           | 0.01                 | 0.78                          |

| <b>(D) Paxillin and Force for T12 Vinculin MEF</b> |                     |                      |                               |
|----------------------------------------------------|---------------------|----------------------|-------------------------------|
| <b>Stiffness</b>                                   | <b>Blebbistatin</b> | <b>R<sup>2</sup></b> | <b>P-value vs. Zero Slope</b> |
| 3 kPa                                              | Control             | 0.08                 | 0.23                          |
| 3 kPa                                              | Treatment           | 0.04                 | 0.15                          |
| 5 kPa                                              | Control             | 0.07                 | 0.32                          |
| 5 kPa                                              | Treatment           | 0.01                 | 0.91                          |
| 14 kPa                                             | Control             | 0.09                 | 0.31                          |
| 14 kPa                                             | Treatment           | 0.14                 | 0.08                          |
